# Supplementary material for: The population structure of Glossina fuscipes fuscipes in the Lake Victoria basin in Uganda: implications for vector control
Source: PubMed Central journal article supplement (PMC3522534; doi:10.1186/1756-3305-5-222), 2012-10-04
Supplement: 1756-3305-5-222-S4.pdf [file 1756-3305-5-222-S4.pdf]

**Table S2.** *Pairwise  $F_{ST}$  values.*  $F_{ST}$  values were computed for 4 clusters, averaged across 15 loci based on Weir and Cockerham [40].  $F_{ST}$  values are reported in the lower diagonal and significance ( $\alpha = 0.05$ ) in the upper diagonal ('-': not significant; '+': significant)

|           | Cluster 1 | Cluster 2 | Cluster 3 | Cluster 4 |
|-----------|-----------|-----------|-----------|-----------|
| Cluster 1 |           | +         | +         | +         |
| Cluster 2 | 0.184     |           | +         | +         |
| Cluster 3 | 0.191     | 0.124     |           | +         |
| Cluster 4 | 0.182     | 0.145     | 0.036     |           |
